# Supplementary material for: Anatomical localization of progenitor cells in human breast tissue reveals enrichment of uncommitted cells within immature lobules
Source: PubMed Central journal article supplement (PMC4303132; doi:10.1186/s13058-014-0453-3), 2014-10-15
Supplement: 13058_2014_453_MOESM1_ESM.pdf [file 13058_2014_453_MOESM1_ESM.pdf]

**Supplementary Table 1. Origin of tissue collected from reduction mammoplasty surgeries.**

| <b>Patient</b> | <b>Age Range (yrs)</b> | <b>Year Collected</b> | <b>Use of Hormonal Contraceptives</b> | <b>Number of Pregnancies</b> |
|----------------|------------------------|-----------------------|---------------------------------------|------------------------------|
| 1              | >20                    | 2007                  | Yes                                   | 0                            |
| 2              | >20                    | 2009                  | Yes                                   | Unknown                      |
| 3              | 20-24                  | 2010                  | Yes                                   | 0                            |
| 4              | 20-24                  | 2009                  | Yes                                   | 0                            |
| 5              | 20-24                  | 2009                  | No                                    | Unknown                      |
| 6              | 20-24                  | 2009                  | Yes                                   | 0                            |
| 7              | 25-29                  | 2008                  | Unknown                               | Unknown                      |
| 8              | 25-29                  | 2009                  | Yes                                   | 0                            |
| 9              | 25-29                  | 2009                  | Unknown                               | Unknown                      |
| 10             | 35-39                  | 2007                  | Unknown                               | 3                            |
| 11             | 35-39                  | 2008                  | Unknown                               | Unknown                      |
| 12             | 35-39                  | 2008                  | Mirena IUD                            | 3                            |
| 13             | 35-39                  | 2009                  | Yes                                   | 3                            |
| 14             | 40-44                  | 2007                  | No, IVF treatment                     | 0                            |
| 15             | 40-44                  | 2009                  | No, fertility treatment               | 2                            |
| 16             | 50-54                  | 2009                  | Unknown                               | Unknown                      |
| 17             | 50-54                  | 2007                  | Unknown                               | 1                            |
| 18             | 50-54                  | 2007                  | Unknown                               | Unknown                      |
| 19             | 55-59                  | 2008                  | Unknown                               | Unknown                      |

**Supplementary Table 2. Percentage of Mature Luminal, Luminal Progenitor, Mature Basal, and Basal Progenitor Cell Populations.**

| <b>Patient</b> | <b>Age Range (yrs)</b> | <b>EpCAM<sup>hi</sup> CD49f<sup>-</sup> (ML)</b> | <b>EpCAM<sup>hi</sup> CD49f<sup>+</sup> (LPCs)</b> | <b>EpCAM<sup>lo</sup> CD49f<sup>+</sup> (MB)</b> | <b>EpCAM<sup>-</sup> CD49f<sup>+</sup> (BPCs)</b> |
|----------------|------------------------|--------------------------------------------------|----------------------------------------------------|--------------------------------------------------|---------------------------------------------------|
| 1              | >20                    | 57.0                                             | 13.1                                               | 13.6                                             | 16.3                                              |
| 2              | >20                    | 9.8                                              | 38.4                                               | 33.4                                             | 18.4                                              |
| 4              | 20-24                  | 27.3                                             | 45.7                                               | 12.9                                             | 14.1                                              |
| 6              | 25-29                  | 19.1                                             | 48.0                                               | 13.4                                             | 19.6                                              |
| 7              | 25-29                  | 16.5                                             | 58.2                                               | 17.9                                             | 7.4                                               |
| 8              | 25-29                  | 79.4                                             | 1.6                                                | 1.9                                              | 17.1                                              |
| 10             | 35-39                  | 11.0                                             | 44.0                                               | 15.0                                             | 30.0                                              |
| 11             | 35-39                  | 86.4                                             | 1.2                                                | 5.1                                              | 7.2                                               |
| 12             | 35-39                  | 32.6                                             | 47.8                                               | 10.1                                             | 9.6                                               |
| 13             | 35-39                  | 21.0                                             | 35.0                                               | 11.0                                             | 33.0                                              |
| 14             | 40-44                  | 31.2                                             | 13.6                                               | 43.2                                             | 12.0                                              |
| 15             | 40-44                  | 41.0                                             | 18.0                                               | 25.0                                             | 16.0                                              |
| 16             | 45-49                  | 52.6                                             | 14.7                                               | 21.4                                             | 11.4                                              |
| 17             | 50-54                  | 96.4                                             | 0.4                                                | 1.0                                              | 2.1                                               |
| 19             | 55-59                  | 63.7                                             | 20.2                                               | 7.7                                              | 8.5                                               |

**Supplementary Table 3. Frequency of progenitor cells measured by *in vitro* assays of patient derived mammary epithelial cells.**

| <b>Patient</b> | <b>Age Range (yrs)</b> | <b>Freq Adherent Colonies</b> | <b>Enrichment of Colonies</b> | <b>Freq CK8/14 Colonies</b> | <b>Freq Mammo-spheres</b> | <b>Freq Floating Colonies</b> | <b>Freq 3D Colonies</b> |
|----------------|------------------------|-------------------------------|-------------------------------|-----------------------------|---------------------------|-------------------------------|-------------------------|
| 1              | >20                    | 0.0074                        | Basal                         | 0.00047                     | 0.004                     | NT                            | NT                      |
| 2              | >20                    | 0.0049                        | Basal                         | 0.0017                      | 0.0038                    | 0.0023                        | 0.0073                  |
| 3              | 20-24                  | 0.0066                        | Luminal                       | 0.001                       | 0.0039                    | 0.0026                        | 0.0006                  |
| 4              | 20-24                  | 0.00084                       | Basal                         | 0.00028                     | 0.004                     | 0.0035                        | 0.0063                  |
| 5              | 20-24                  | 0.015                         | Luminal                       | 0.003                       | 0.018                     | 0.015                         | 0.0043                  |
| 6              | 25-29                  | 0.0093                        | Basal                         | 0.027                       | 0.0069                    | 0.0022                        | 0.0024                  |
| 7              | 25-29                  | 0.0043                        | Luminal                       | 0.00035                     | 0.0028                    | 0.0019                        | NT                      |
| 8              | 25-29                  | 0.042                         | Luminal                       | 0.00045                     | 0.0089                    | 0.0082                        | 0.0016                  |
| 9              | 25-29                  | 0.014                         | Basal                         | 0.0016                      | 0.011                     | 0.0007                        | 0.0016                  |
| 10             | 35-39                  | 0.0058                        | Luminal                       | 0.00095                     | 0.014                     | 0.0081                        | NT                      |
| 11             | 35-39                  | 0.0094                        | Basal                         | 0.0071                      | 0.0051                    | 0.0021                        | NT                      |
| 12             | 35-39                  | 0.0063                        | Luminal                       | 0.00062                     | 0.0078                    | 0.0086                        | 0.0026                  |
| 13             | 35-39                  | 0.003                         | Luminal                       | 0.00008                     | 0.0091                    | 0.0073                        | 0.0018                  |
| 14             | 40-44                  | 0.029                         | Basal                         | 0.0037                      | 0.0056                    | 0.0033                        | NT                      |
| 15             | 40-44                  | 0.012                         | Basal                         | 0.00043                     | 0.0056                    | 0.00035                       | 0.0044                  |
| 16             | 45-49                  | 0.0072                        | Luminal                       | 0.0003                      | 0.0045                    | 0.0025                        | 0.00083                 |
| 17             | 50-54                  | 0.0018                        | Luminal                       | 0.00028                     | 0.0036                    | 0.0044                        | 0.001                   |
| 18             | 50-54                  | 0.0033                        | Luminal                       | 0.0014                      | 0.0067                    | 0.0042                        | 0.003                   |
| 19             | 55-59                  | 0.0041                        | Luminal                       | 0.00048                     | NT                        | NT                            | NT                      |

NT=not tested

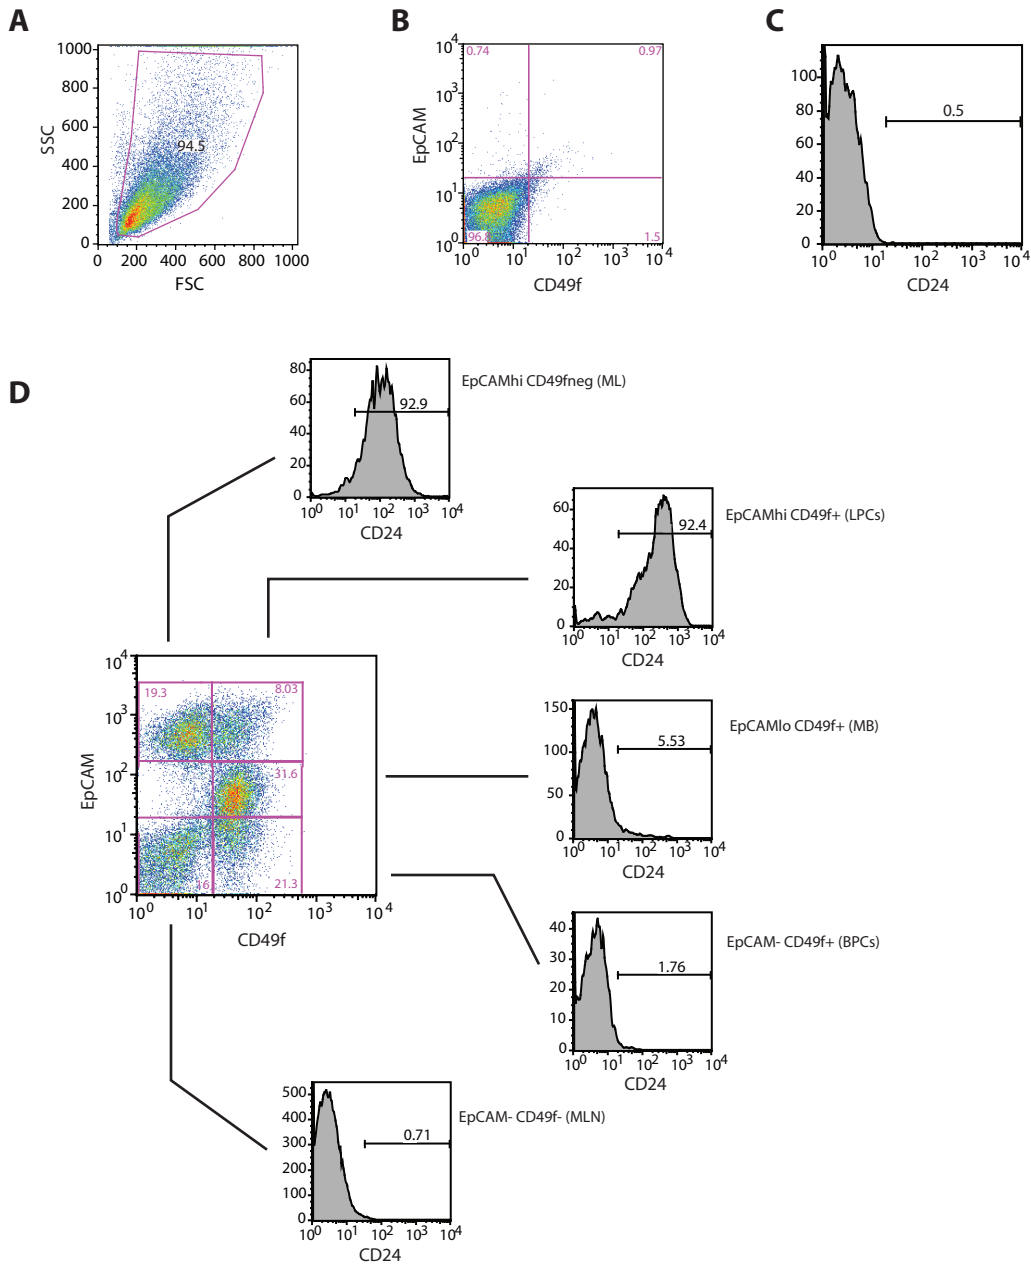

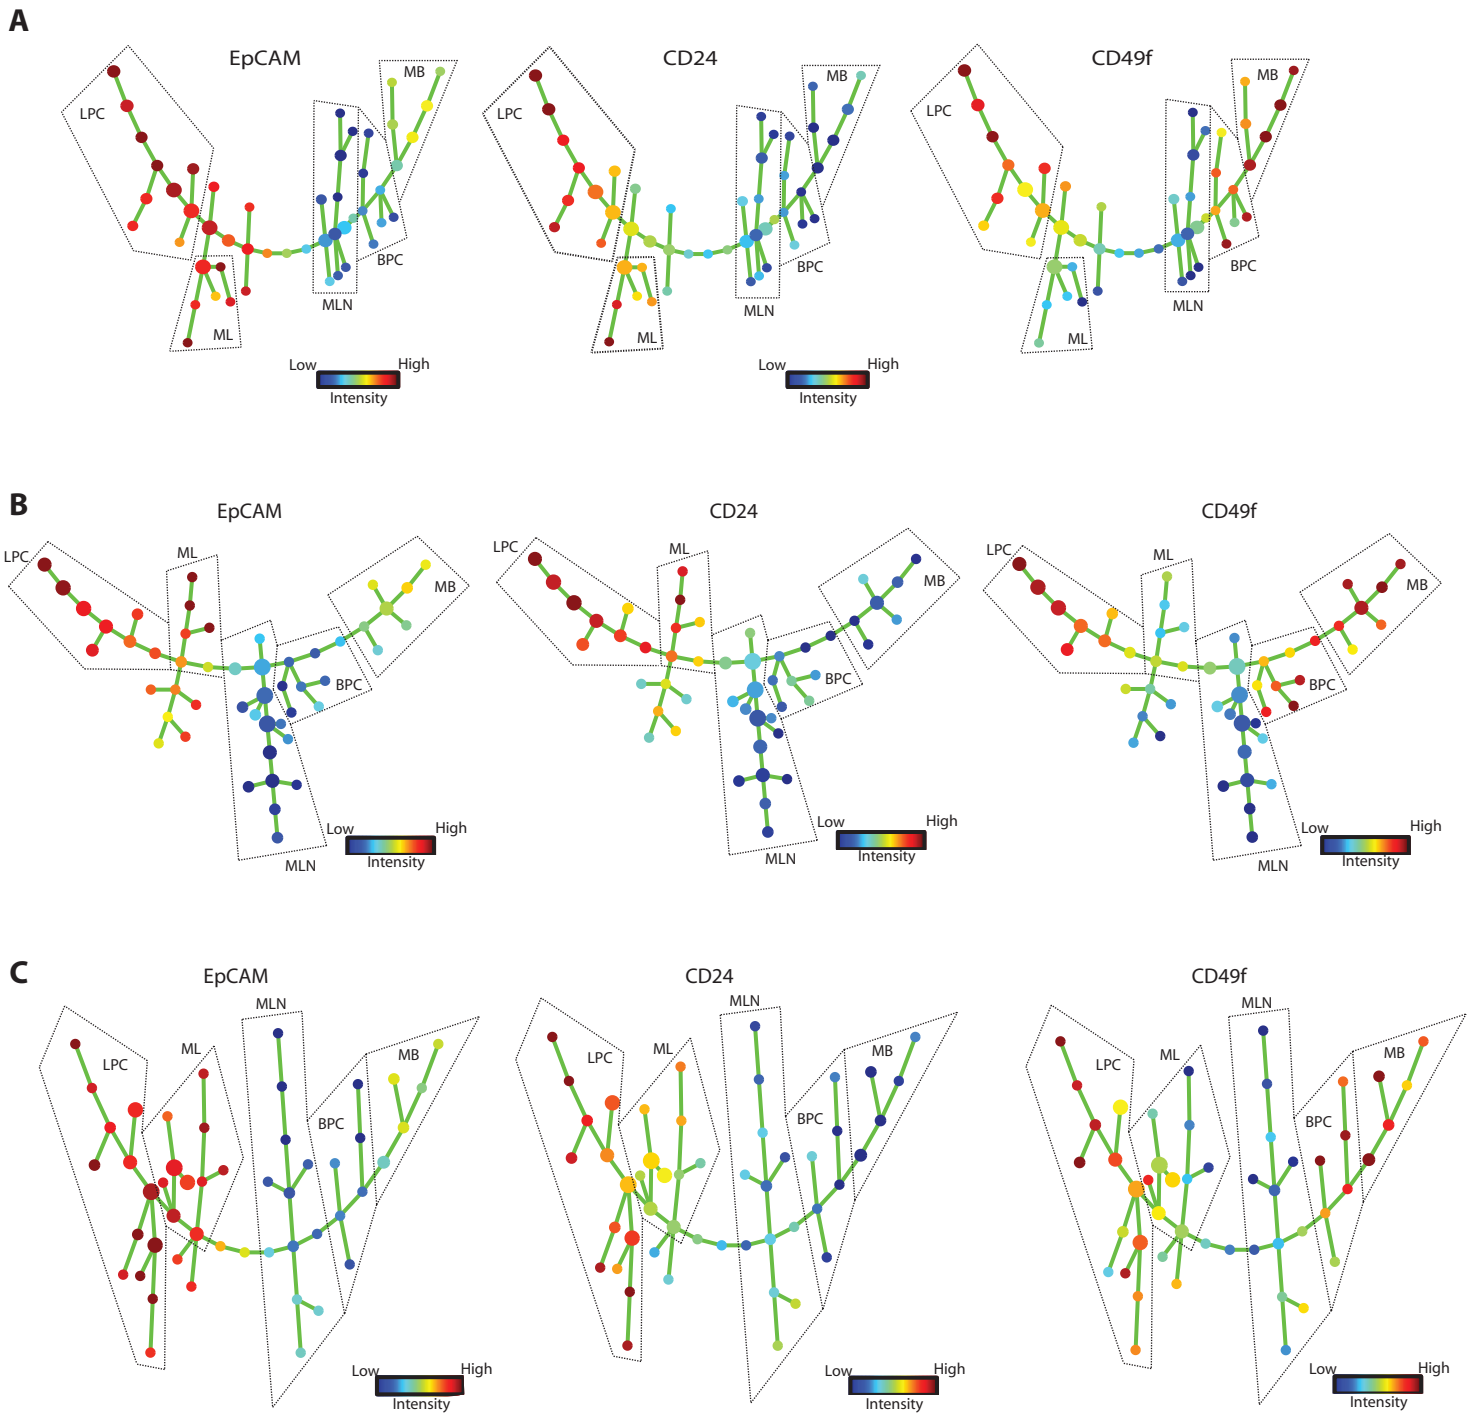

**Figure S1. Flow cytometry gating strategy for EpCAM, CD49f, and CD24.** (A) Cell population gated to remove cellular debris and doublets. (B) Gates for EpCAM<sup>+</sup> and CD49f<sup>+</sup> cells based on isotype controls for each antibody. (C) Gate for CD24<sup>+</sup> cells based on isotype control for CD24 antibody. (D) Gates for each cellular population: Mature Luminal (ML) EpCAM<sup>hi</sup>CD49f<sup>-</sup>, Luminal Progenitor Cells (LPCs) EpCAM<sup>hi</sup>CD49f<sup>+</sup>, Mature Basal (MB) EpCAM<sup>lo</sup>CD49f<sup>+</sup>, Basal Progenitor Cells (BPC) EpCAM<sup>-</sup>CD49f<sup>+</sup>, Mammary Lineage Negative (MLN) EpCAM<sup>-</sup>CD49f<sup>-</sup>. CD24 expression denoted for each population.

**Figure S2. SPADE applied to mammary epithelial cell flow cytometry data.** (A) SPADE tree derived from the flow cytometry data of cell surface markers EpCAM, CD24, CD49f from patient samples with known lobule composition (n=8 patient samples). Trees are colored by the median intensity of each individual marker. Dashed lines denote cell populations based on cell surface markers: Mature Luminal (ML) EpCAM<sup>hi</sup>CD24<sup>+</sup>CD49f<sup>-</sup>, Luminal Progenitor Cells (LPCs) EpCAM<sup>hi</sup>CD24<sup>+</sup>CD49f<sup>+</sup>, Mature Basal (MB) EpCAM<sup>lo</sup>CD24<sup>-</sup>CD49f<sup>+</sup>, Basal Progenitor Cells (BPC) EpCAM<sup>-</sup>CD24<sup>-</sup>CD49f<sup>+</sup>, Mammary Lineage Negative (MLN) EpCAM<sup>-</sup>CD24<sup>-</sup>CD49f<sup>-</sup>. (B, C) SPADE tree derived from the flow cytometry data of cell surface markers EpCAM, CD24, CD49f from patient samples enriched for Type I/Type II (B) and Type III (C) lobules types (n=4 patient samples/group). Trees are colored by the median intensity of each individual marker.
