# Supplementary material for: Anatomical localization of progenitor cells in human breast tissue reveals enrichment of uncommitted cells within immature lobules
Source: Springer Nature journal article supplement (doi:10.1186/s13058-014-0453-3), 2014-10-14
Supplement: MOESM8 [file 9781200]

**Table 1. Summary of frequency of progenitor activity.**

| UNCULTURED CELLS                    |                    |                |          |
|-------------------------------------|--------------------|----------------|----------|
| Progenitor Type                     | Progenitor Lineage | Frequency      |          |
| <b>Adherent progenitors (N=9)</b>   |                    |                |          |
| Total                               | Both               | 0.0098±0.0023  | 9.8/1000 |
| Bi-potent                           | Both               | 0.002±0.0014   | 2/1000   |
| Luminal Progenitors                 | Luminal            | 0.0036±0.004   | 3.6/1000 |
| Basal Progenitors                   | Basal              | 0.0029±0.004   | 2.9/1000 |
| <b>Non-adherent progenitors</b>     |                    |                |          |
| Mammospheres (N=19)                 | Both               | 0.0067±0.00092 | 6.7/1000 |
| Floating colonies (N=18)            | Luminal            | 0.0048±0.00088 | 4.8/1000 |
| <b>Structural progenitors (N=3)</b> |                    |                |          |
| Total                               |                    | 0.003±0.0006   | 3/1000   |
| Luminal Alveolar Progenitor         | Luminal            | 0.002±0.003    | 2/1000   |
| Basal Ductal Progenitor             | Basal              | 0.0009±0.0004  | 0.9/1000 |
| Ave age: 34.5±12.6 yrs (mean±s.d.)  |                    |                |          |
